# Supplementary material
Source: PubMed Central journal article supplement (PMC4360799)
Supplement: supp_2.3.e85_figure_e-1.pdf [file supp_2.3.e85_figure_e-1.pdf]

a.1

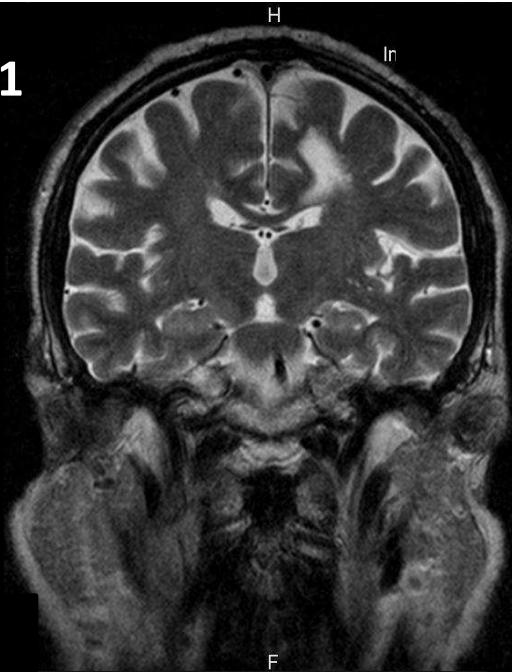

a.2

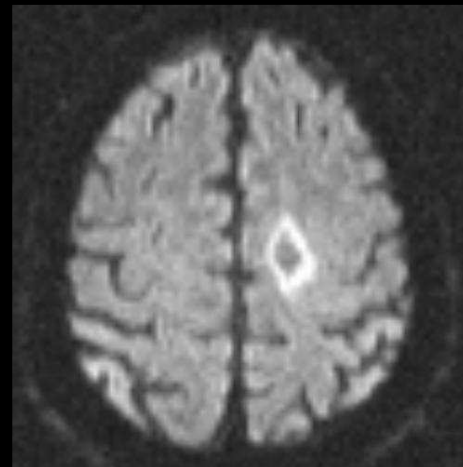

a.3

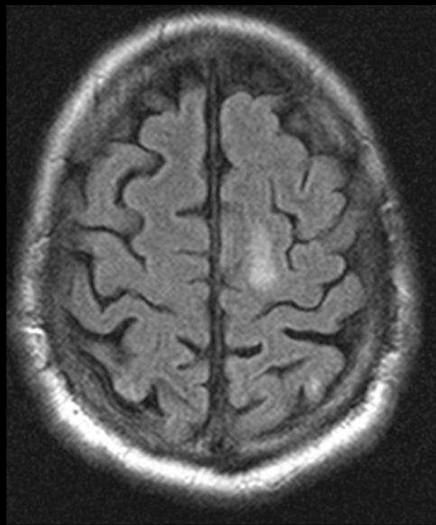

a.4

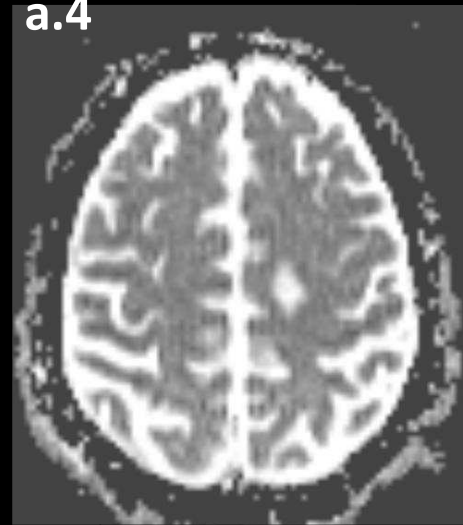

Figure e-1: MRI scan of the brain (July/2013).

Figure e-1 a.1: T2 coronar MRI.

Figure e-1 a.2: B1000 MRI scan.

Figure e-1 a.3: FLAIR MRI scan.

Figure e-1 a.4: ADC MRI scan.

**b.1**

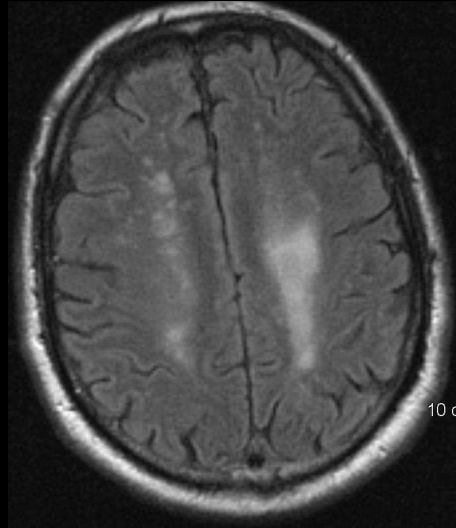

**b.2**

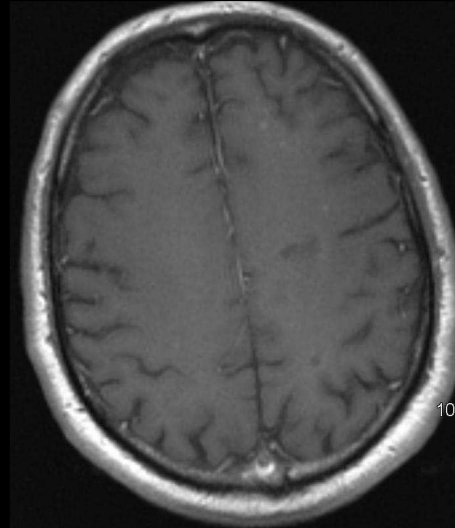

Figure e-1 b: Follow-up MRI scan during IRIS (10/2013).

Figure e-1 b.1: FLAIR.

Figure e-1 b.2: T1 post gadolinium.

**c.1**

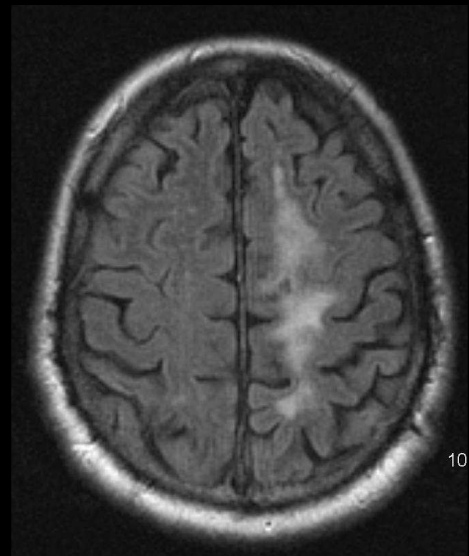

Figure e-1 c: Last follow-up MRI scan (2/2014).  
Figure e-1 c.1: FLAIR.
